# Supplementary material for: SnO2@Co3O4p–n heterostructures fabricated by electrospinning and mechanism analysis enhanced acetone sensing
Source: Royal Society of Chemistry journal article supplement (doi:10.1039/c4ra09766a), 2014-10-31
Supplement: c4ra09766a1.pdf [file c4ra09766a1.pdf]

Electronic Supporting Information for  
**SnO<sub>2</sub>@Co<sub>3</sub>O<sub>4</sub> p-n heterostructures fabricated by electrospun  
and mechanism analysis enhanced acetone sensing**

Shouli Bai<sup>a</sup>, Haiyan Liu<sup>a</sup>, Ruixian Luo<sup>a\*</sup>, Aifan Chen<sup>a</sup>, Dianqing Li<sup>a</sup>

<sup>a</sup> State Key Laboratory of Chemical Resource Engineering, Beijing University of Chemical Technology, Beijing 100029, China. E-mail: luorx@mail.buct.edu.cn.

**Table S1** Absolute electronegativity ( $X$ ), estimated band gap ( $E_g$ ), energy levels of calculated conduction band edge (CB), and valence band edge (VB) for Fe<sub>2</sub>O<sub>3</sub> and WO<sub>3</sub>

|                                | $X$  | $E_g$ (eV) | CB<br>(eV) | VB<br>(eV) |
|--------------------------------|------|------------|------------|------------|
| Co <sub>3</sub> O <sub>4</sub> | 5.93 | 2.94       | -0.04      | 2.90       |
| SnO <sub>2</sub>               | 6.25 | 3.50       | 0          | 3.50       |

The band gap energy of Co<sub>3</sub>O<sub>4</sub> was calculated by its UV-Vis absorption spectra (shown in Figure S1)

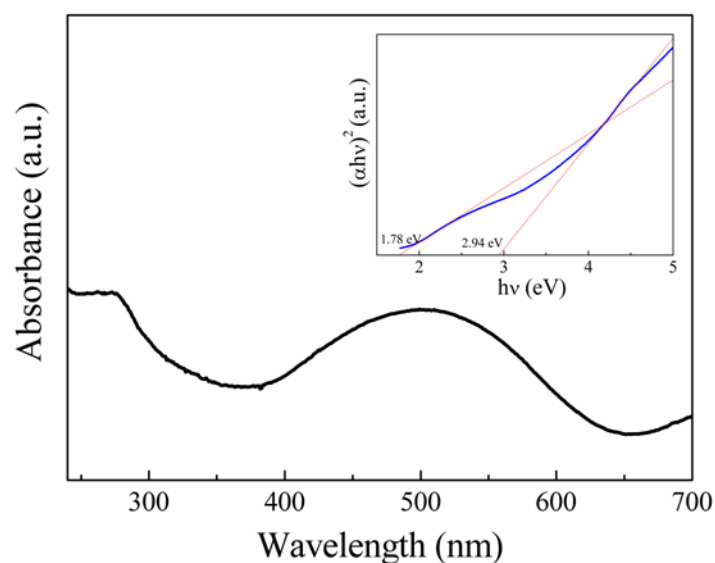

**Figure S1.** UV-Vis absorption spectra of Co<sub>3</sub>O<sub>4</sub> (inset: the  $(\alpha hv)^2$ - $hv$  curves).

The UV-vis spectra of Co<sub>3</sub>O<sub>4</sub> is shown in Figure S1. The band gap ( $E_g$ ) engineering of Co<sub>3</sub>O<sub>4</sub> can be calculated by the following Equation:

$$(\alpha hv)^2 = A(hv - E_g)$$

Where  $\alpha$  is the optical density,  $hv$  is the photon energy and  $A$  is a constant relative to the material. Therefore, the band gaps of Co<sub>3</sub>O<sub>4</sub> estimated from the extrapolated intercept with the  $\alpha = 0$  shown in Figure S1 inset are 1.78 eV and 2.94 eV. The first band can be assigned to the O<sup>2-</sup>→Co<sup>3+</sup> charge transfer (the Co<sup>3+</sup> located below the conduction band), while the second one is ascribed to the O<sup>2-</sup>→Co<sup>2+</sup> charge transfer process.

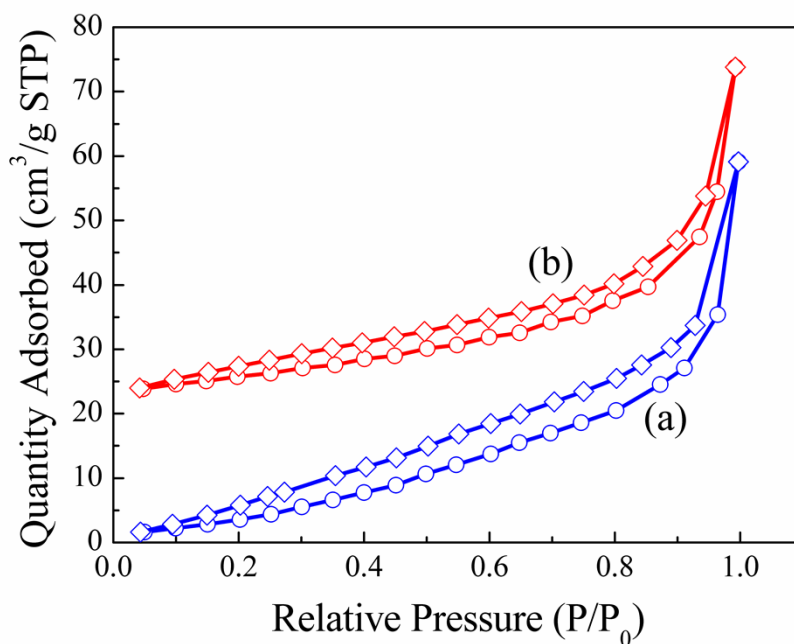

**Figure S2.** Nitrogen adsorption–desorption isotherms of (a)  $\text{Co}_3\text{O}_4$  (b)  $\text{SnO}_2@\text{Co}_3\text{O}_4$  samples.

As shown in Figure S2, the  $\text{N}_2$  adsorption-desorption analysis of  $\text{Co}_3\text{O}_4$  and  $\text{SnO}_2@\text{Co}_3\text{O}_4$  samples were carried out to estimate their surface areas, which is an important parameters related to gas sensing properties, and they show similar  $\text{N}_2$  adsorption-desorption isotherms. According to Brunauer-Deming-Deming-Teller (BDDT) classification, it is seen that the isotherms belong to Type IV with an H3 hysteresis loop, which are typical for mesoporous materials.
